# Supplementary material
Source: publisher site journal article supplement (https://www.dovepress.com/article/594436)
Supplement: Supplementary file 1 [file 594436%20Revised%20Supplementary%20materials_1.docx]

**Supplementary Materials**

| Supplementary Table 1. Comparison of baseline characteristics between study subjects and excluded group(n=697). | | | |
| --- | --- | --- | --- |
| Variable | Study Subjects (n = 324) | Excluded from initial enrollment(n = 373) | *P* value |
| Demographic |  |  |  |
| Age, years | 51.9 ± 15.9 | 52.8 ± 17.8 | 0.485 |
| Age group, n (%) |  |  |  |
| < 65 years | 247 (76.2) | 269(72.1) | 0.216 |
| ≥ 65 years | 77 (23.8) | 104(27.9) |  |
| Sex, n (%) |  |  |  |
| Male | 226 (69.8) | 251(67.3) | 0.486 |
| Female | 98 (30.2) | 122(32.7) |  |
| Body mass index, kg m⁻² | 22.0 ± 3.5 | 21.5 ± 4.6 | 0.111 |
| Residence, n (%) |  |  |  |
| Urban | 99 (30.6) | 112(30.0) | 0.880 |
| Rural | 225 (69.4) | 261(70.0) |  |
| Educational level, n (%) |  |  |  |
| Primary school or below | 106 (32.7) | 135(36.2) | 0.347 |
| Junior high/technical school | 106 (32.7) | 101(27.1) |  |
| Senior high/vocational school | 69 (21.3) | 91(24.4) |  |
| College or above | 43 (13.3) | 46(12.3) |  |
| Marital status, n (%) |  |  |  |
| Married | 224 (69.2) | 265(72.0) | 0.077 |
| Divorced or widowed | 61 (18.8) | 77(20.9) |  |
| Unmarried | 39 (12.0) | 26(7.1) |  |
| Medical history |  |  |  |
| Active smoking, n (%) |  |  |  |
| No | 151 (46.6) | 185(49.6) | 0.430 |
| Yes | 173 (53.4) | 188(50.4) |  |
| Passive smoking, n (%) |  |  |  |
| No | 136 (42.0) | 174(46.6) | 0.216 |
| Yes | 188 (58.0) | 199(53.4) |  |
| Alcohol consumption, n (%) |  |  |  |
| No | 181 (55.9) | 200(53.6) | 0.553 |
| Yes | 143 (44.1) | 173(46.4) |  |
| Dust exposure, n (%) |  |  |  |
| No | 292 (90.1) | 340(91.2) | 0.641 |
| Yes | 32 (9.9) | 33(8.8) |  |
| Hypertension, n (%) |  |  |  |
| No | 220 (67.9) | 256(68.6) | 0.836 |
| Yes | 104 (32.1) | 117(31.4) |  |
| Diabetes mellitus, n (%) |  |  |  |
| No | 229 (70.7) | 240(64.3) | 0.075 |
| Yes | 95 (29.3) | 133(35.7) |  |
| BCG vaccination, n (%) |  |  |  |
| No | 41 (12.7) | 55(14.7) | 0.424 |
| Yes | 283 (87.3) | 318(85.3) |  |

| Supplementary Table 2. Multicollinearity diagnosis of independent variables included in the logistic regression model. | | |
| --- | --- | --- |
| Factors | Tolerance | VIF |
| Age group | 0.851 | 1.176 |
| Active smoking | 0.957 | 1.045 |
| Dust exposure | 0.978 | 1.022 |
| BCG vaccination | 0.865 | 1.156 |
| Cavitary pulmonary tuberculosis | 0.850 | 1.176 |
| Invasive fungal disease | 0.963 | 1.039 |
| Systemic corticosteroid use | 0.839 | 1.191 |
| Cough | 0.960 | 1.042 |
| Dyspnea | 0.908 | 1.101 |
| Systemic immune-inflammation index (SII) | 0.955 | 1.047 |
| CD4⁺/CD8⁺ T-cell ratio | 0.935 | 1.069 |

| Supplementary Table 3. Final multivariable prediction model for COPD after PTB cure. | | | | | |
| --- | --- | --- | --- | --- | --- |
| Variable | β coefficient | s.e. | Wald χ² | Odds ratio (95% CI) | *P* value |
| Age group |  |  |  |  |  |
| < 65 years | Reference | - | - | 1.00 (reference) | - |
| ≥ 65 years | 1.118 | 0.322 | 12.028 | 3.06 (1.63 ,5.75) | 0.001 |
| Active smoking |  |  |  |  |  |
| No | Reference | - | - | 1.00 (reference) | - |
| Yes | 1.020 | 0.311 | 10.741 | 2.77 (1.51 ,5.10) | 0.001 |
| Cavitary PTB |  |  |  |  |  |
| No | Reference | - | - | 1.00 (reference) | - |
| Yes | 1.063 | 0.338 | 9.878 | 2.89 (1.49 ,5.61) | 0.002 |
| Invasive fungal disease |  |  |  |  |  |
| No | Reference | - | - | 1.00 (reference) | - |
| Yes | 0.692 | 0.306 | 5.116 | 2.00 (1.10 ,3.64) | 0.024 |
| Dyspnea |  |  |  |  |  |
| No | Reference | - | - | 1.00 (reference) | - |
| Yes | 1.004 | 0.418 | 5.765 | 2.73 (1.20 ,6.20) | 0.016 |
| SII | 0.001 | <0.001 | 11.569 | 1.001 (1.0004 ,1.002) | 0.001 |
| CD4⁺/CD8⁺ T-cell ratio | -0.373 | 0.176 | 4.488 | 0.69 (0.49 ,0.97) | 0.034 |
| *Abbreviations*: | | | | | |

CI, confidence interval; OR, odds ratio; PTB, pulmonary tuberculosis; SE, standard error; SII, systemic immune–inflammation index.


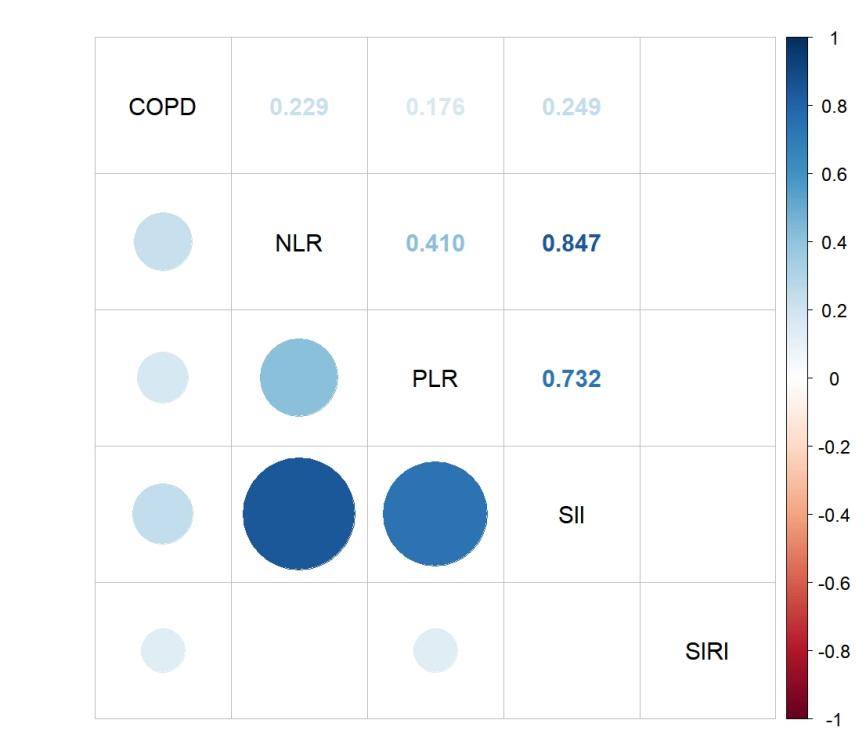


Supplementary Figure 1. Correlations between blood cell–derived inflammatory indices and COPD occurrence after pulmonary tuberculosis cure. Spearman correlation heatmap illustrating associations between inflammatory indices and post-PTB COPD. Circle size represents the strength of correlation, and color indicates direction and magnitude of the correlation coefficient.

NLR, neutrophil-to-lymphocyte ratio; PLR, platelet-to-lymphocyte ratio; SII, systemic immune-inflammation index; SIRI, systemic inflammation response index.


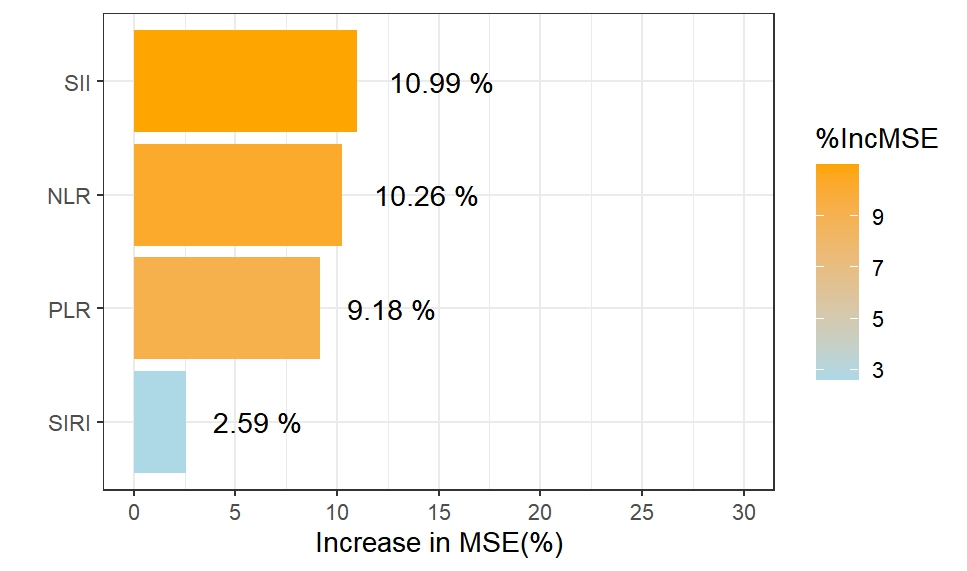


Supplementary Figure 2. Relative importance of blood cell–derived inflammatory indices for post-tuberculosis COPD identified by random forest analysis. Variable importance ranked by percentage increase in mean squared error (%IncMSE) upon permutation.

NLR, neutrophil-to-lymphocyte ratio; PLR, platelet-to-lymphocyte ratio; SII, systemic immune-inflammation index; SIRI, systemic inflammation response index.


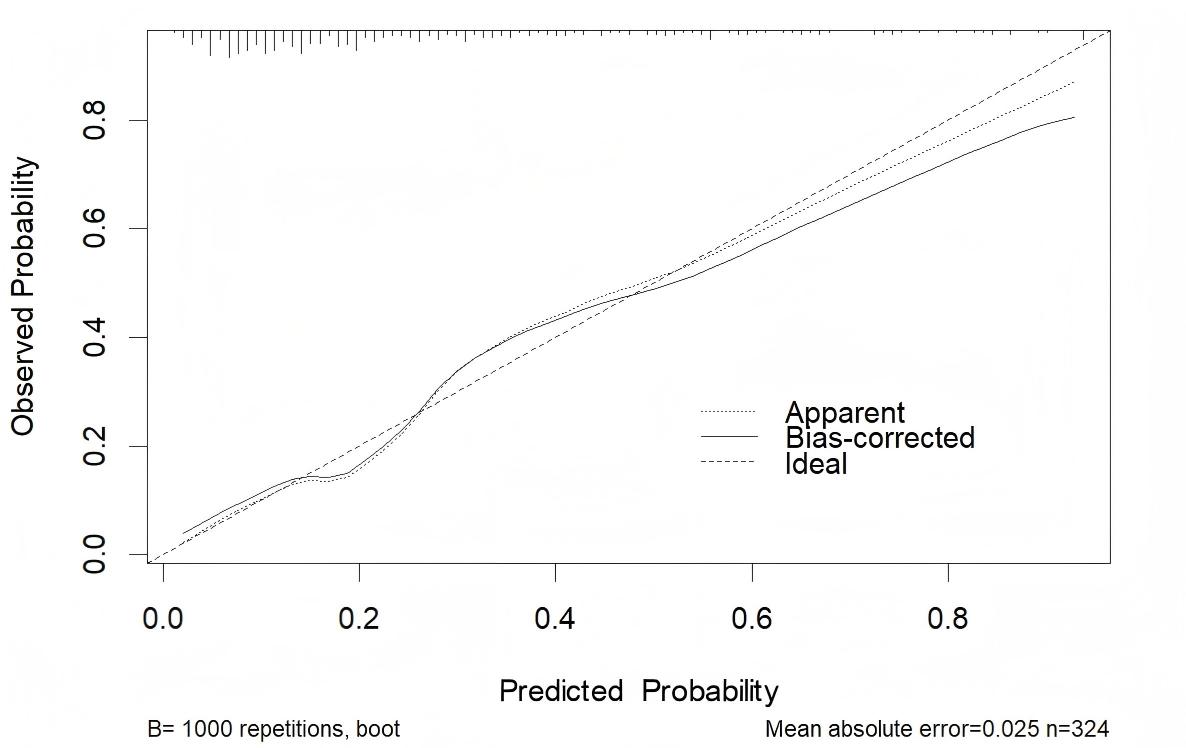


Supplementary Figure 3. Calibration plot of the prediction model for COPD after PTB cure.
Calibration plot comparing predicted and observed probabilities of COPD. The dashed diagonal line represents perfect calibration. The dotted line indicates the apparent calibration, whereas the solid line represents the bootstrap-corrected calibration based on 1,000 bootstrap resamples. The model demonstrated good agreement between predicted and observed probabilities, with a mean absolute calibration error of 0.025 in the study cohort.


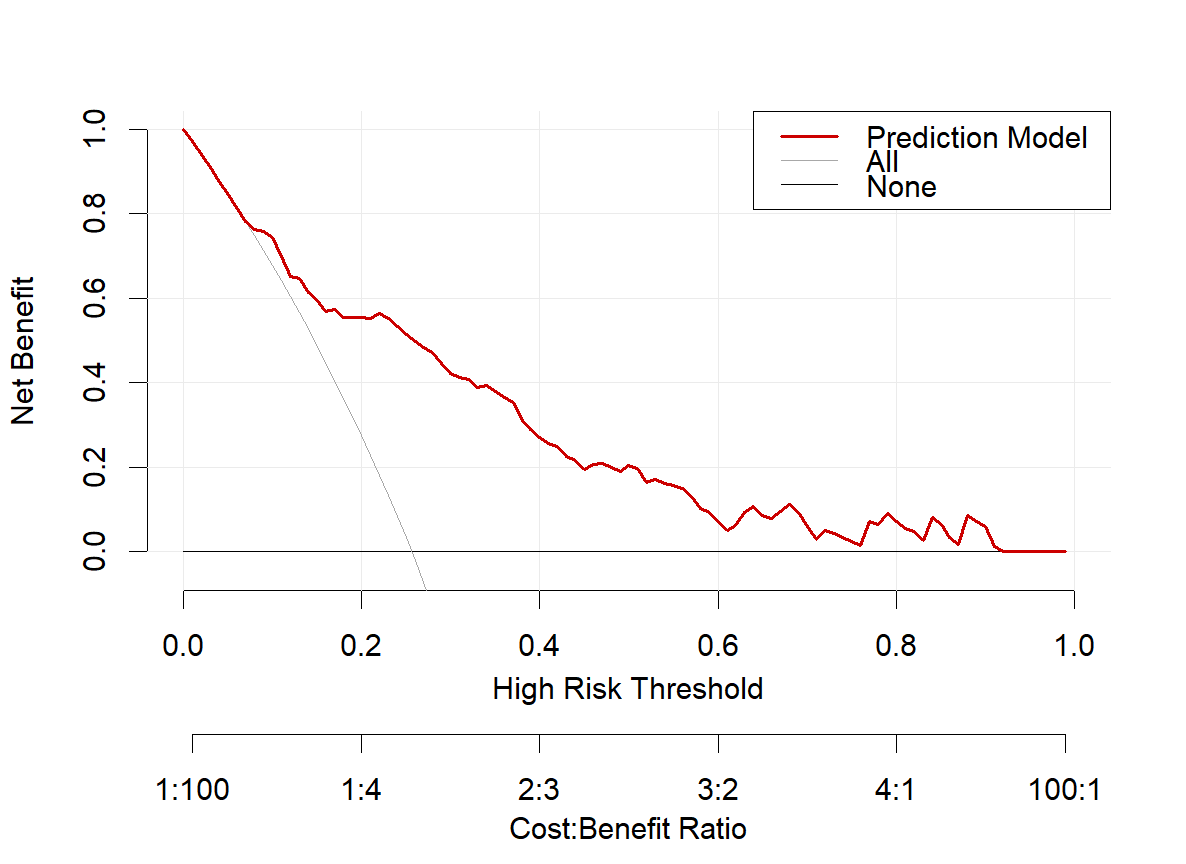


Supplementary Figure 4. Decision curve analysis of the prediction model for chronic obstructive pulmonary disease after pulmonary tuberculosis cure. Decision curve analysis illustrating the net clinical benefit of the prediction model across a range of threshold probabilities. The red line represents the prediction model, while the grey lines indicate the treat-all and treat-none strategies. Across a broad range of clinically relevant thresholds, the prediction model yields a higher net benefit than either reference strategy, supporting its potential clinical utility for risk-guided follow-up after pulmonary tuberculosis cure.
